# Supplementary material for: Benchmarking a fast, satisficing vehicle routing algorithm for public health emergency planning and response: “Good Enough for Jazz”
Source: PeerJ journal article supplement (doi:10.7717/peerj-cs.1541), 2023-09-01
Supplement: AppendixA.pdf [file AppendixA.pdf]

## Appendix A. Supplementary Material on RSSD Algorithm

---

### Algorithm 1 RSSD Algorithm

---

**Input** $V, D, p, \tau, \psi$ **Output** $R: R_i \in R : \forall t(r_i) \leq \tau \wedge c(r_i) \leq \psi$ 

- 1:  $tcr \leftarrow \mathbf{tCompliant}(V, D, \tau)$
  - 2:  $\text{bool } noncompliance \leftarrow \text{true}$
  - 3: **while**  $noncompliance$  **do**
  - 4:    $ctcR, pr \leftarrow \mathbf{cCompliant}(tcr, D, \psi)$
  - 5:    $R \leftarrow R \cup ctcR$
  - 6:   **if**  $t(pr) > \tau$  **then**
  - 7:      $mtcR \leftarrow \mathbf{tCompliant}(pr, D, \tau)$
  - 8:      $tcr \leftarrow tcr \cup mtcR$
  - 9:   **elif**  $c(pr) > \psi$  **then**
  - 10:      $mtcR \leftarrow \mathbf{tCompliant}(pr, D, \tau)$
  - 11:   **else**
  - 12:      $noncompliance \leftarrow \text{false}$
  - 13:      $R \leftarrow R \cup pr$
  - 14:   **end if**
  - 15: **end while**
- 

---

### Algorithm 2 tCompliant

---

**Input** $V, D, p, \tau$ **Output** $tcR: R_i \in R : \forall t(r_i) \leq \tau$ 

- 1:  $r_1, r_2 \leftarrow \mathbf{SpatialPartition}(V, D, p)$
  - 2:  $tcR \leftarrow tcR \cup r_1, r_2$
  - 3: **while**  $t(r_i) > \tau \forall r_i \in tcR$  **do**
  - 4:    $tcR \leftarrow tcR \setminus r_i$
  - 5:    $r_a, r_b \leftarrow \mathbf{SpatialPartition}(r_i, D, p)$
  - 6:    $tcR \leftarrow tcR \cup \{r_a, r_b\}$
  - 7: **end while**
-

---

**Algorithm 3** SpatialPartition

---

**Input** $V, D, p$ **Output** $tcR: R_i \in R : \forall t(r_i) \leq \tau$ 

- 1:  $r_a, r_b \leftarrow \{V \setminus p\}.maxVs(D)$
  - 2: **while**  $|r_a| + |r_b| \neq n - |p|$  **do**
  - 3:   **if**  $t(r_a) \leq t(r_b)$  **then**
  - 4:      $r_a \leftarrow r_a \cup v_i$ , where  $v_i \leftarrow \{r_a^{-1}, r_a^0\}.minV(D, V \setminus \{p, r_a, r_b\})$
  - 5:   **else**
  - 6:      $r_b \leftarrow r_b \cup v_i$ , where  $v_i \leftarrow \{r_b^{-1}, r_b^0\}.minV(D, V \setminus \{p, r_b, r_a\})$
  - 7:   **end if**
  - 8:    $r_a \leftarrow r_a \cup p_x$  where  $p_x \leftarrow \{r_a^{-1}, r_a^0\}.minV(D, p)$
  - 9:    $r_b \leftarrow r_b \cup p_x$  where  $p_x \leftarrow \{r_b^{-1}, r_b^0\}.minV(D, p)$
  - 10: **end while**
  - 11: **return**  $r_a, r_b$
- 

---

**Algorithm 4** cCompliant

---

**Input** $tcR, p, D, \psi$ **Output** $ctcR: R_i \in R : \forall t(r_i) \leq \tau \wedge c(r_i) \leq \psi$  $pr$ : New route composed of pruned notes

- 1: **while**  $tcR$  **do**
  - 2:   **for**  $r_i$  **in**  $tcR$  **do**
  - 3:     **while**  $c(r_i) > \psi \forall r_i \in tcR$  **do**
  - 4:        $pr \leftarrow pr \cup v_i$ , where  $v_i \leftarrow p.minv(D, r_i)$
  - 5:        $r_i \leftarrow r_i \setminus v_i$
  - 6:     **end while**
  - 7:      $ctcR \leftarrow ctcR \cup r_i$
  - 8:      $tcR \leftarrow tcR \setminus r_i$
  - 9:   **end for**
  - 10: **end while**
  - 11: **return**  $ctcR, pr$
-

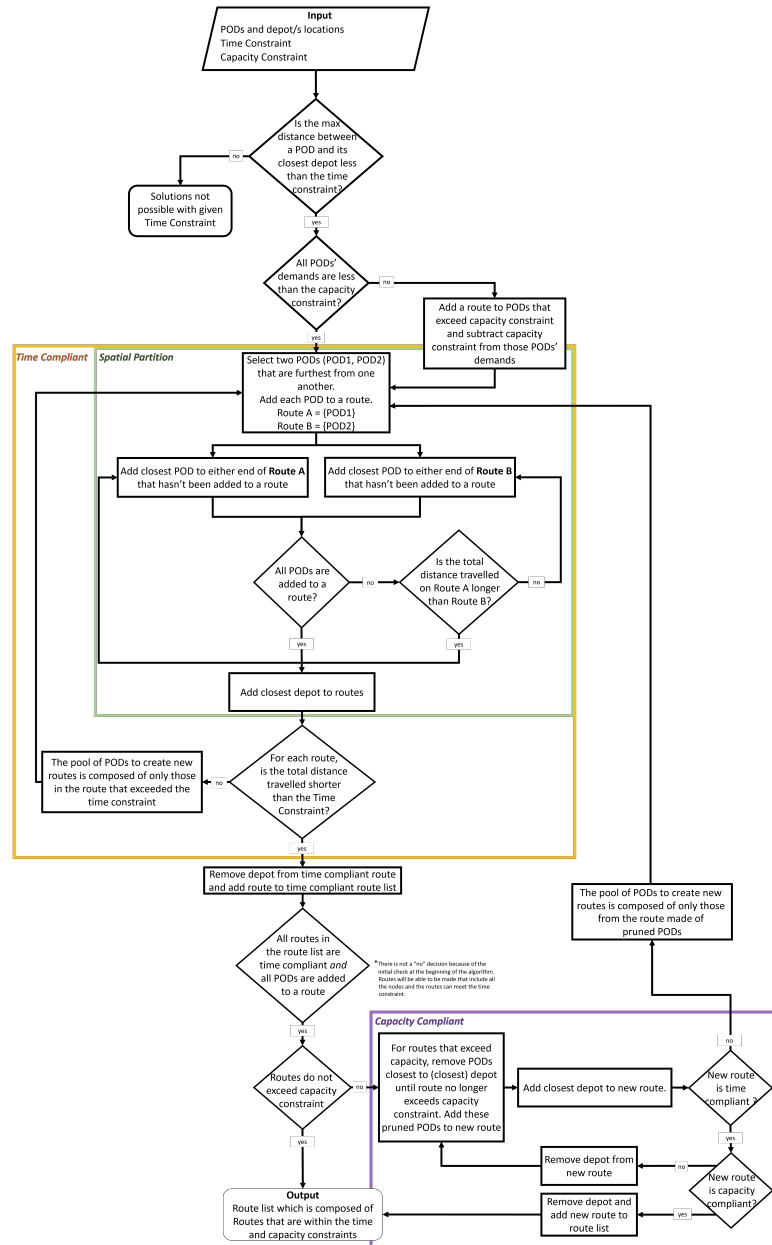

**Figure A1** – The same flow chart as Figure 2 about the work flow of RSSD, but instead uses text explanations instead of mathematical notation.
