# Supplementary material for: Benchmarking a fast, satisficing vehicle routing algorithm for public health emergency planning and response: “Good Enough for Jazz”
Source: PeerJ journal article supplement (doi:10.7717/peerj-cs.1541), 2023-09-01
Supplement: AppendixB.pdf [file AppendixB.pdf]

## Appendix B. Supplementary Graphs of Process Times

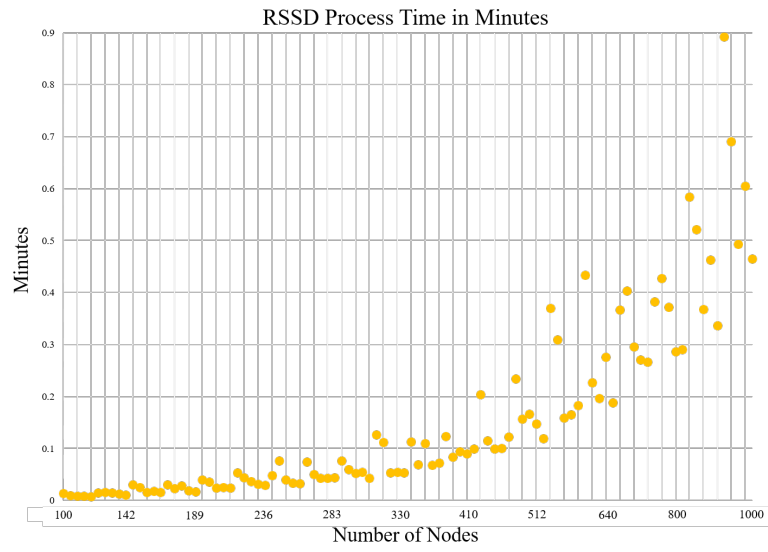

Figure B1 – The process time for RSSD across all instances in minutes

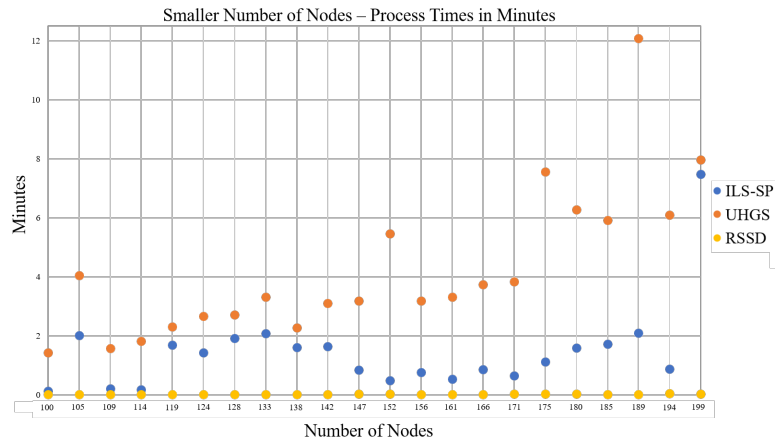

Figure B2 – The process time in minutes for ILS-SP, UHGS, and RSSD across instances with less than 200 nodes
