# Supplementary material for: Benchmarking a fast, satisficing vehicle routing algorithm for public health emergency planning and response: “Good Enough for Jazz”
Source: PeerJ journal article supplement (doi:10.7717/peerj-cs.1541), 2023-09-01
Supplement: AppendixC.pdf [file AppendixC.pdf]

## Appendix C. Data Table

**Table C1** – Mean, Min, Max, and Standard Deviation across metrics for all solutions.

|        | Best Known |        |        |        | RSSD   |        |        |        | Difference |         |         |        |
|--------|------------|--------|--------|--------|--------|--------|--------|--------|------------|---------|---------|--------|
|        | Mean       | Min    | Max    | SD     | Mean   | Min    | Max    | SD     | Mean       | Min     | Max     | SD     |
| UnCap  | 0.0277     | 0.0000 | 0.1352 | 0.0268 | 0.2487 | 0.0398 | 0.8364 | 0.1414 | -0.2210    | -0.8162 | -0.0382 | 0.1305 |
| RngMax | 0.8223     | 0.4751 | 0.9974 | 0.1180 | 0.7181 | 0.3349 | 0.9955 | 0.1638 | 0.1042     | -0.2140 | 0.4973  | 0.1318 |
| NoR    | 0.1267     | 0.0409 | 0.3333 | 0.0777 | 0.1524 | 0.0468 | 0.3881 | 0.0919 | -0.0257    | -0.0786 | -0.0047 | 0.0195 |
